# Supplementary material for: Borophene and defective borophene as potential anchoring materials for lithium–sulfur batteries: a first-principles study
Source: Royal Society of Chemistry journal article supplement (doi:10.1039/c7ta09244j), 2017-12-27
Supplement: c7ta09244j1.pdf [file c7ta09244j1.pdf]

## Supporting information

### **Borophene and defective borophene as the potential anchoring materials for lithium-sulfur batteries: a first-principles study**

H.R. Jiang, W. Shyy, M. Liu, Y.X. Ren, T.S. Zhao\*  
Department of Mechanical and Aerospace Engineering,  
The Hong Kong University of Science and Technology,  
Clear Water Bay, Kowloon, Hong Kong, China

---

\*Corresponding author. Tel.: (852) 2358 8647 E-mail: [metzhao@ust.hk](mailto:metzhao@ust.hk) (T.S. Zhao)

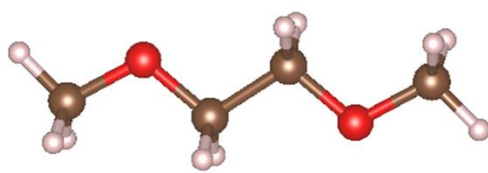

**Fig. S1.** The optimized structures of DME. The brown, red and white balls represent for carbon, oxygen and hydrogen, respectively.

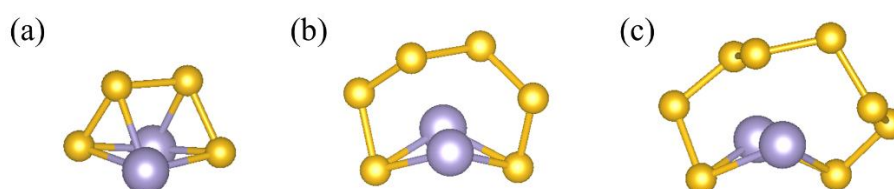

**Fig. S2.** The most stable structures of (a) Li<sub>2</sub>S<sub>4</sub>, (b) Li<sub>2</sub>S<sub>6</sub> and (c) Li<sub>2</sub>S<sub>8</sub>. The yellow and purple balls represent for sulfur and lithium, respectively.

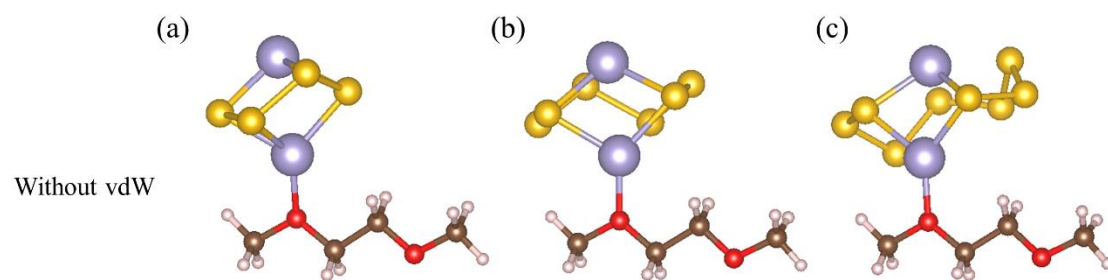

**Fig. S3.** The most stable structures of (a)  $\text{Li}_2\text{S}_4$ , (b)  $\text{Li}_2\text{S}_6$  and (c)  $\text{Li}_2\text{S}_8$  adsorbed on DME simulated without vdW functional.

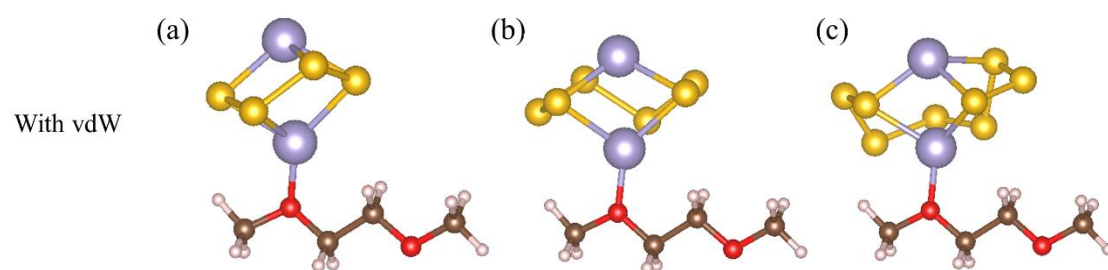

**Fig. S4.** The most stable structures of (a)  $\text{Li}_2\text{S}_4$ , (b)  $\text{Li}_2\text{S}_6$  and (c)  $\text{Li}_2\text{S}_8$  adsorbed on DME simulated with vdW functional.

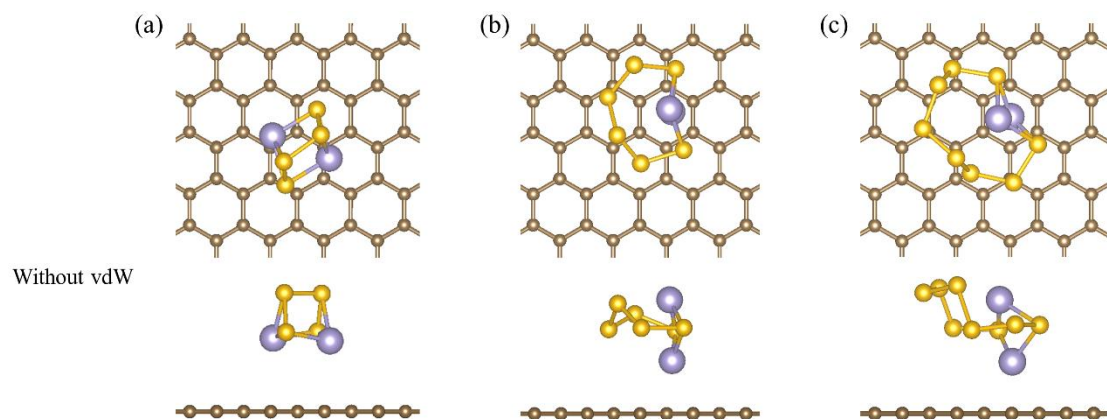

**Fig. S5.** The most stable structures of (a)  $\text{Li}_2\text{S}_4$ , (b)  $\text{Li}_2\text{S}_6$  and (c)  $\text{Li}_2\text{S}_8$  adsorbed graphite (0001) surface simulated without vdW functional.

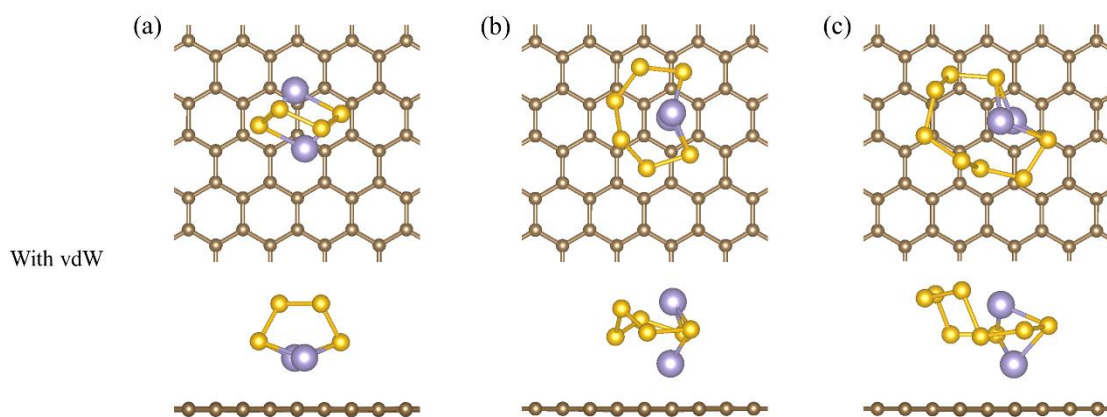

**Fig. S6.** The most stable structures of (a)  $\text{Li}_2\text{S}_4$ , (b)  $\text{Li}_2\text{S}_6$  and (c)  $\text{Li}_2\text{S}_8$  adsorbed graphite (0001) surface simulated with vdW functional.

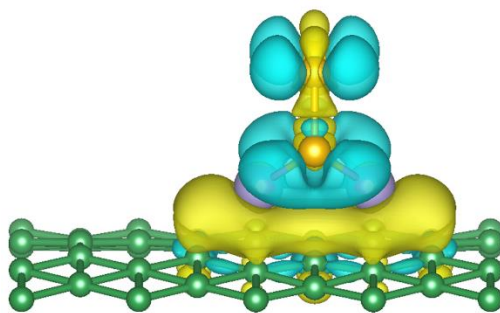

**Fig. S7.** The charge difference plot of  $\text{Li}_2\text{S}_4$  on defective borophene. The blue and yellow areas represent for electron loss and gain.

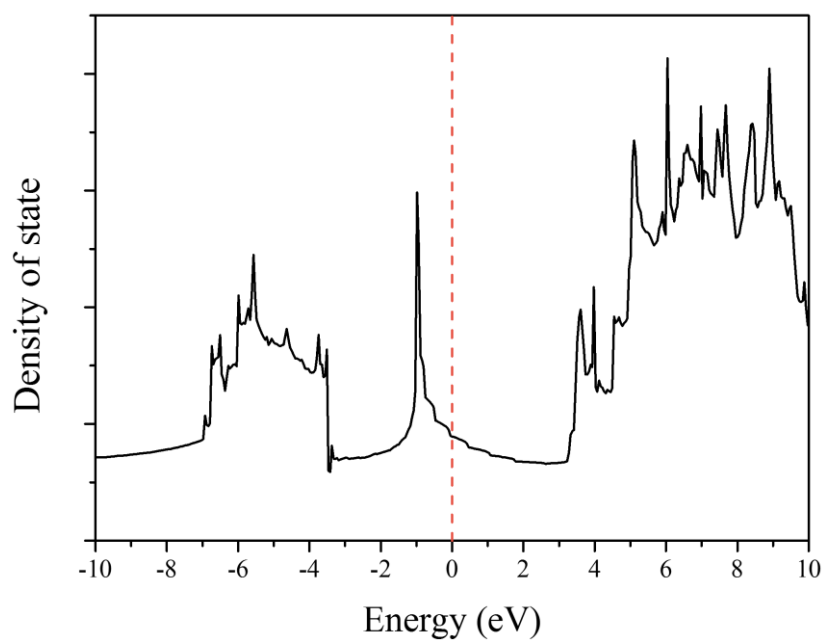

**Fig. S8.** The DOS of pristine borophene.
